# Supplementary material
Source: publisher figshare collection journal article supplement (https://sage.figshare.com/ndownloader/files/23770482)
Supplement: Supplementary file 1 [file 23770482]

*This file replicates the tabels in Cunningham, Huang, and Sawyer "Voting for Militants: Rebel Elections in Civil War" Journal of Conflict Resolution. Accepted for publication 2020.

*Table 1: Regional distribution of election users
tab elect region_new

*Table 2. Logistic Regression Wartime Elections (Unit of analysis: civil war, 1950–2006)

*Model 1: social services 
logit elect service, robust

*Model 2:
logit elect service marxist lnwardur aim3 territorial_control natural, robust

*Model 3: diplomacy
logit elect diplomacy, robust

*Model 4: diplomacy
logit elect diplomacy lnwardur coldwar anyintervention aim3 remit, robust

*Mode 5: capacity
logit elect mobcapacity, robust

*Model 6: capacity
logit elect mobcapacity lnwardur territorial_control marxist aim3 rebstrength_ordinal, robust

*Table 3. Logistic Regression Wartime Elections with Coarsened Exact Matching
*Model 1: service
imb   marxist lnwardur aim3 territorial_control, treatment(service)
cem marxist lnwardur aim3 territorial_control, treatment(service)
logit elect service [iweight=cem_weights]
*Model 2: service
logit elect service marxist lnwardur aim3 territorial_control natural [iweight=cem_weights]

drop cem_weights
*Model 3: diplomacy
imb  lnwardur coldwar anyintervention aim3 remit rebsupport, treatment(diplomacy_recode)
cem lnwardur coldwar anyintervention aim3 remit rebsupport, treatment(diplomacy_recode)
logit elect diplomacy_recode [iweight=cem_weights]
*Model 4: diplomacy
logit elect diplomacy_recode lnwardur coldwar anyintervention aim3 remit [iweight=cem_weights]

drop cem_weights
drop if mobcapacity_dichotemous==.
**DATA IS CHANGED WITH THIS DROP**

*Model 5: capacity
imb  lnwardur territorial_control marxist aim3 rebstrength_ordinal, tr(mobcapacity_dichotemous) 
cem lnwardur territorial_control marxist aim3 rebstrength_ordinal, tr(mobcapacity_dichotemous)
logit elect mobcapacity_dichotemous [iweight=cem_weights]
*Model 6: capacity
logit elect mobcapacity_dichotemous lnwardur territorial_control marxist aim3 rebstrength_ordinal [iweight=cem_weights]
